# Supplementary material
Source: MDPI journal article supplement (https://www.mdpi.com/2313-0105/10/3/102)
Supplement: s1 [file s1]

## Supplementary Materials

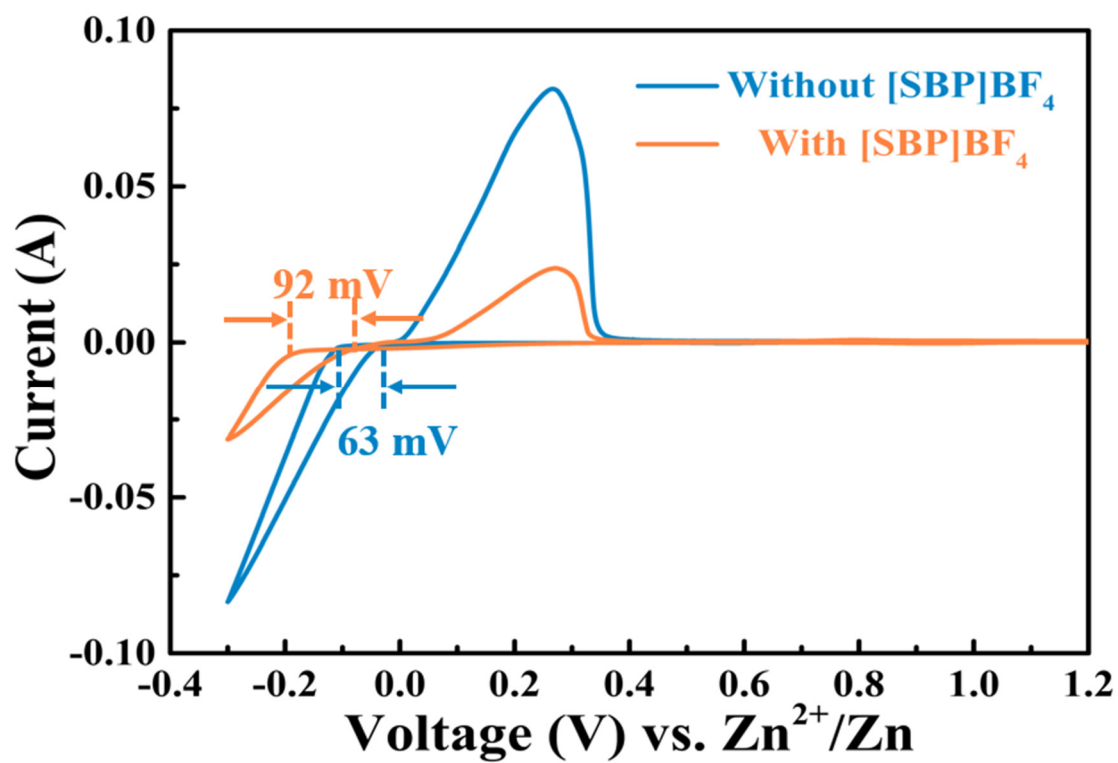

Figure S1 The CV curves of Zn//SS cells with and without [SBP]BF<sub>4</sub> at 1 mV s<sup>-1</sup>.

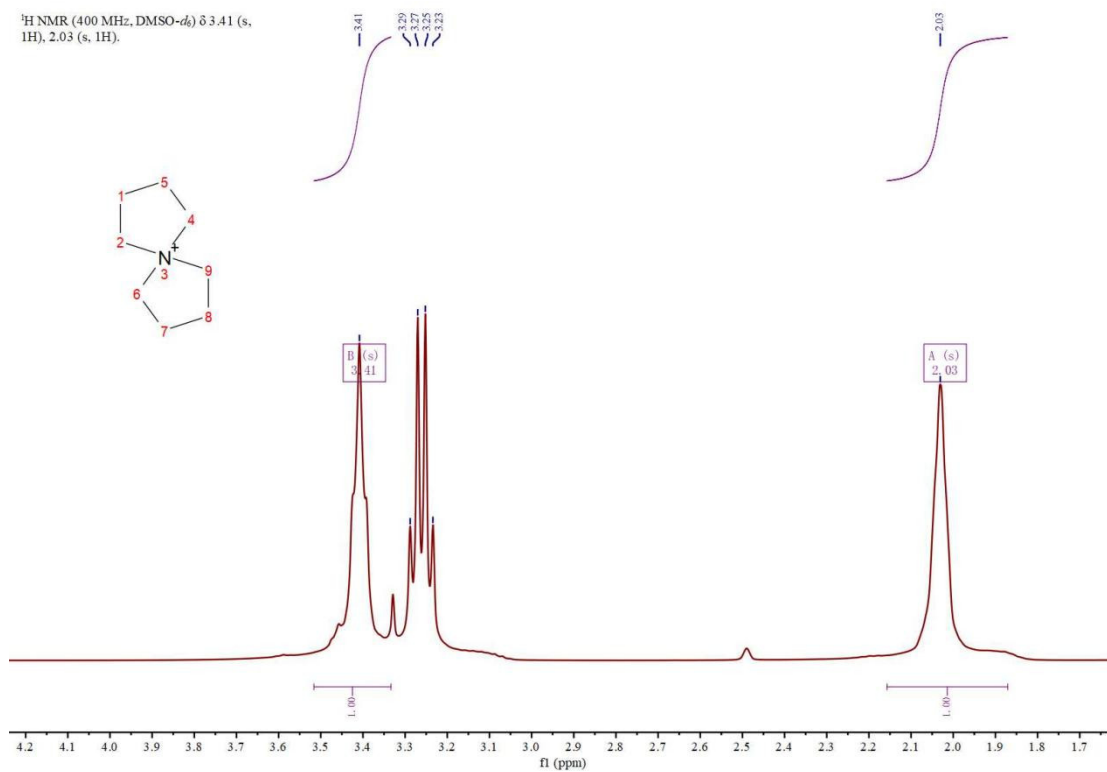

Figure S2 <sup>1</sup>H NMR spectra of [SBP]BF<sub>4</sub> samples.

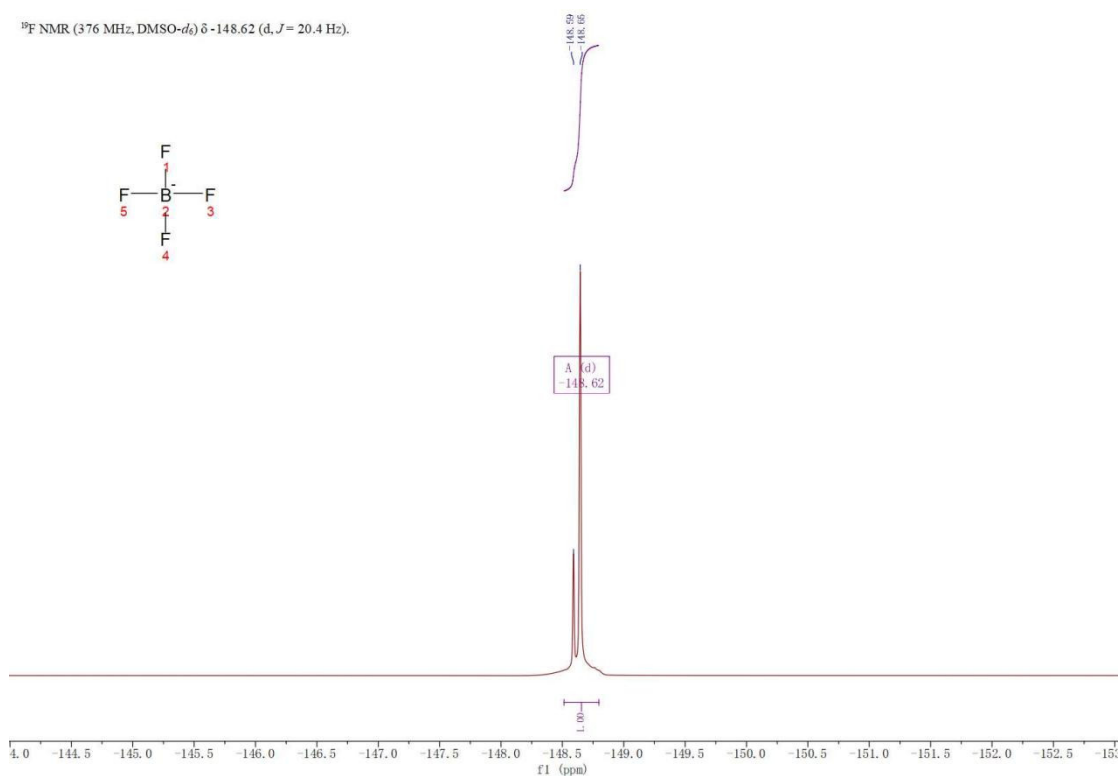

Fig. S3  $^{19}\text{F}$  NMR spectra of  $[\text{SBP}]\text{BF}_4$  samples.

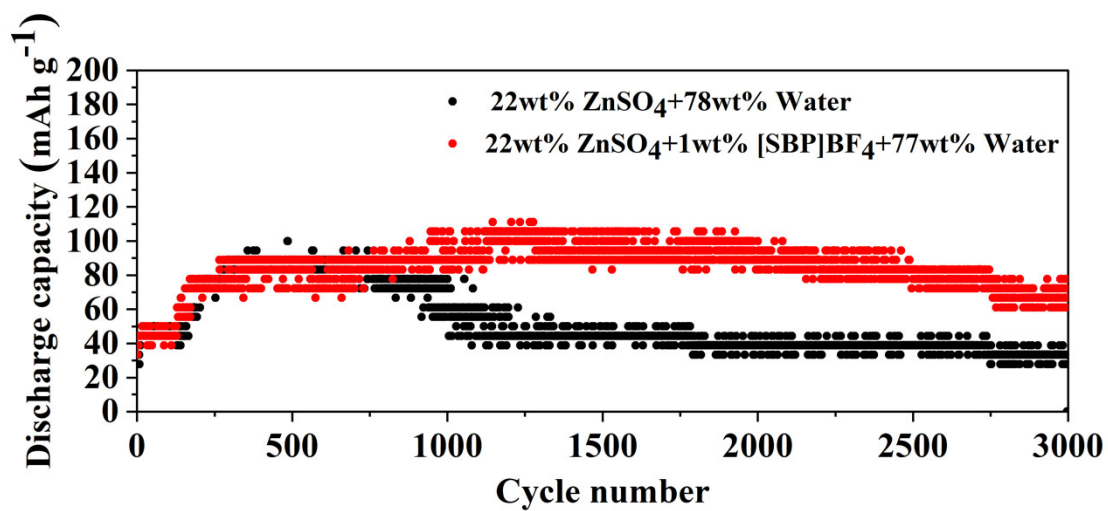

Figure S4 Cycling performance of  $\text{Zn}/\text{V}_2\text{O}_5$  batteries with and without additives at  $20\text{ A g}^{-1}$  current density.

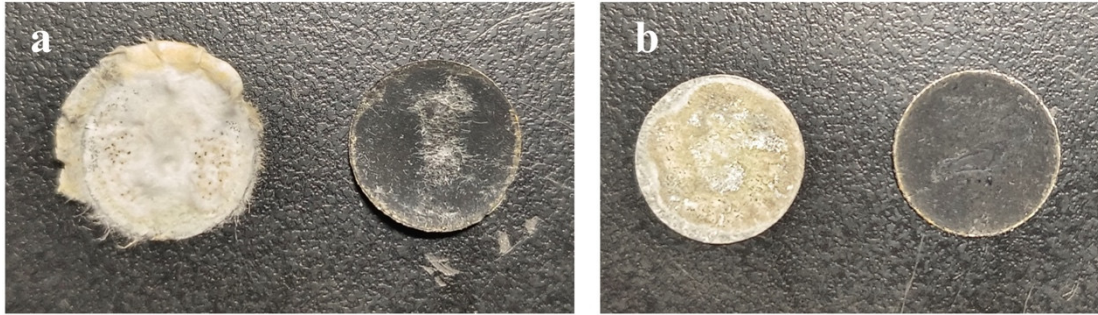

**Figure S5** Photographs of the pole pieces peeled off from (a) Zn//V<sub>2</sub>O<sub>5</sub> batteries without additives and (b) Zn//V<sub>2</sub>O<sub>5</sub> batteries containing additives after 3000 cycles at a current density of 20 A g<sup>-1</sup>.

**Table S1.** Performance comparison of different additives.

| Additives                                             | Cycling Stability of Zn//Zn cells(h)                         | Cycling Stability of Zn//Cu(Ti) cells(cycles)             | Cycling Stability of full cells(cycles)                     | Reference |
|-------------------------------------------------------|--------------------------------------------------------------|-----------------------------------------------------------|-------------------------------------------------------------|-----------|
| 1wt% [SBP]BF <sub>4</sub>                             | 1 mA cm <sup>-2</sup> , 1 mAh cm <sup>-2</sup> for 2000      | 2 mA cm <sup>-2</sup> , 0.5 mAh cm <sup>-2</sup> for 2200 | 2000 at 5 A g <sup>-1</sup><br>3000 at 20 A g <sup>-1</sup> | This work |
| 0.5M [BMIM]OTF                                        | 1 mA cm <sup>-2</sup> , 1 mAh cm <sup>-2</sup> for 1000      | 1 mA cm <sup>-2</sup> , 1 mAh cm <sup>-2</sup> for 1000   | 3000 at 2 A g <sup>-1</sup>                                 | [35]      |
| 1wt% QL <sub>80</sub>                                 | 5 mA cm <sup>-2</sup> , 5 mAh cm <sup>-2</sup> for 200       | /                                                         | 3000 at 1.5 A g <sup>-1</sup>                               | [45]      |
| 10 mM glucose                                         | 1 mA cm <sup>-2</sup> , 1 mAh cm <sup>-2</sup> for 2000      | 1 mA cm <sup>-2</sup> , 0.5 mAh cm <sup>-2</sup> for 200  | 1000 at 3.08 A g <sup>-1</sup>                              | [46]      |
| 3wt% DMF                                              | 1 mA cm <sup>-2</sup> , 1 mAh cm <sup>-2</sup> for 1600      | 1 mA cm <sup>-2</sup> , 1 mAh cm <sup>-2</sup> for 300    | 2000 at 5 C                                                 | [47]      |
| 1 g L <sup>-1</sup> PAM                               | 1 mA cm <sup>-2</sup> , 1 mAh cm <sup>-2</sup> for 180       | /                                                         | 200 at 0.1 A g <sup>-1</sup>                                | [48]      |
| 4M EMImCl                                             | 1 mA cm <sup>-2</sup> , 1 mAh cm <sup>-2</sup> for 500       | 1 mA cm <sup>-2</sup> , 1 mAh cm <sup>-2</sup> for 100    | 300 at 1 A g <sup>-1</sup>                                  | [49]      |
| 1 vol% DME                                            | 2 mA cm <sup>-2</sup> , 2 mAh cm <sup>-2</sup> for 380       | 2.5 mA cm <sup>-2</sup> , 2.5 mAh cm <sup>-2</sup> for 60 | 3000 at 2 A g <sup>-1</sup>                                 | [50]      |
| 1M Li(SO <sub>3</sub> CF <sub>3</sub> ) <sub>2</sub>  | 0.5 mA cm <sup>-2</sup> , 0.25 mAh cm <sup>-2</sup> for 1500 | /                                                         | 700 at 5 C                                                  | [51]      |
| 25mM Zn(H <sub>2</sub> PO <sub>4</sub> ) <sub>2</sub> | 1 mA cm <sup>-2</sup> , 1 mAh cm <sup>-2</sup> for 1200      | 1 mA cm <sup>-2</sup> , 1 mAh cm <sup>-2</sup> for 400    | 1000 at 0.8 A g <sup>-1</sup>                               | [52]      |
